# Supplementary material
Source: Springer Nature journal article supplement (https://www.springermedizin.de/resource/supplementary/12936_2009_1112_MOESM1_ESM.pdf/9549688)

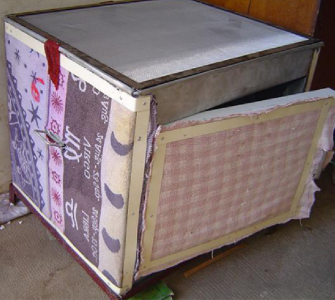

At the end of the night  
The moon is still  
The stars are still  
The night is still  
The night is still

Supplement: MOESM1 [file 9549688]
